# Supplementary material for: Antibacterial Activity and Anti-Quorum Sensing Mediated Phenotype in Response to Essential Oil from Melaleuca bracteata Leaves
Source: PubMed Central journal article supplement (PMC6887945; doi:10.3390/ijms20225696), 2019-11-14
Supplement: ijms-20-05696-s001.pdf [file ijms-20-05696-s001.pdf]

**Table S1.** Primers for fluorescence real-time quantitative PCR.

| Gene                | Forward (5'–3')       | Reverse (5'–3')      |
|---------------------|-----------------------|----------------------|
| <i>cviI</i>         | GAAACCGTCCTCGCATAAGG  | ACAAGGTGGACTGGTACTGG |
| <i>cviR</i>         | CCCAGCAATATGCCGCTATC  | CATTGAGCTTGCGGATCACA |
| <i>vioA</i>         | AAGAGCATGGCAAGGAATC   | CTGGTTGGCGTCGTTATC   |
| <i>vioB</i>         | CTGGGCGTAATTGGGAATGG  | CAAATACCTGGCCCATGTCG |
| <i>vioC</i>         | GAACAAGTACGCCAACCT    | GGAAGAAAGTCTGCTGGAA  |
| <i>vioD</i>         | GCCGCAACAAGTACATCT    | GAAGGTGCTCATCGTGTC   |
| <i>vioE</i>         | ATAGGCCACCTTCTGCTTCC  | GGCTACTGCTGGTTCGACTA |
| <i>hmsH</i>         | CGCCGTATGTCTTCAGTT    | CGCAGCCTATCGTAGATG   |
| <i>hmsF</i>         | GGCTGCTGATTCTCTGTTA   | GTATAGACGCTGCGGTAG   |
| <i>hmsN</i>         | AAACCACACGCACCAGAAC   | TGCATGAGCATGAAGACGAC |
| <i>lasA</i>         | AGCCAGCCTTACGATTCCAT  | GAGGAATAGCCGTTGTCGTG |
| <i>lasB</i>         | AGAACGCCTTGTTGTACACG  | GCAAGAACGACTTCCTGGTC |
| <i>hcnA</i>         | CTCCGTATTCAGACGGTTGC  | ACTGCTGCCTGGTCAAGATA |
| <i>hcnB</i>         | AATCTCTTCAGTCTGTTGGG  | GATGTGCGTCGGCTATTG   |
| <i>hcnC</i>         | ATAGGTGATGGCGGTGTC    | GTGCTGTCGGAGAAGATG   |
| <i>PilE1</i>        | CCTGCTGGAAGTGGTGAT    | GCTGGCGTAGTTGTTGTT   |
| <i>pilE2</i>        | GAGCCGGTATAGGTGCAGTA  | GTGAGCAGCATCAACGTTCT |
| <i>pilE3</i>        | TACGCTGGTTCGAGTTGATGA | GCGAATAGCACTGCTCCATC |
| <i>rpoD</i> (actin) | TCGGACATCAGCAAGGTT    | GTGAAGGACAGCCAACAG   |

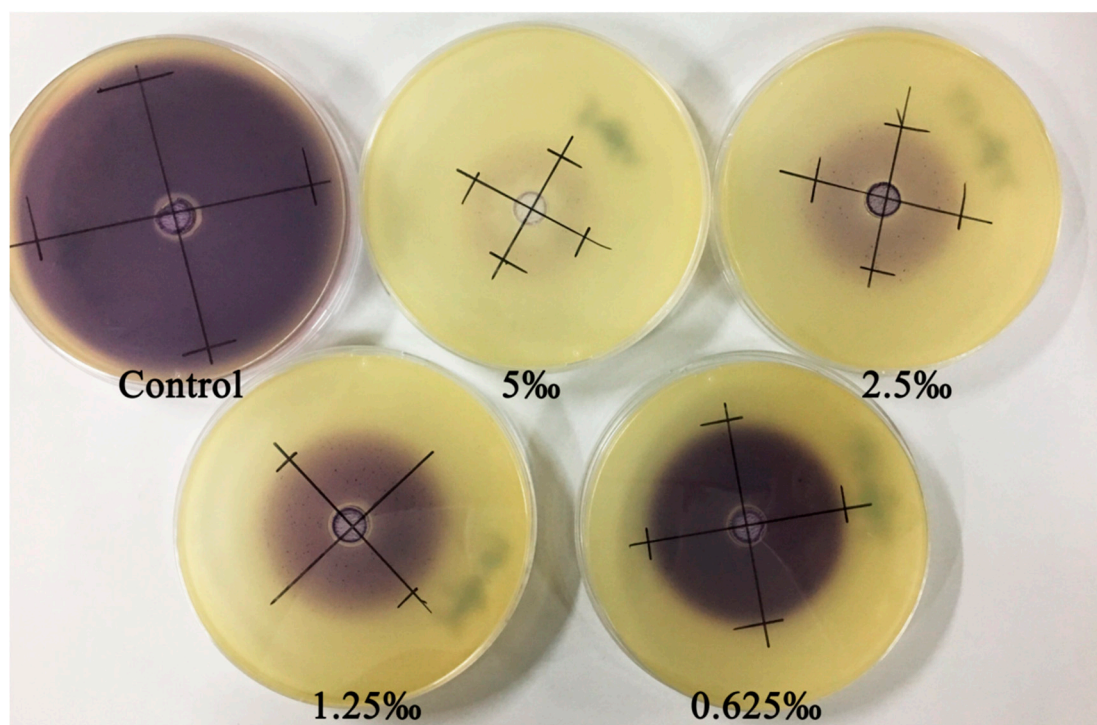

**Figure S1.** Induction of purple color production in CV026 by supernatants of *C. violaceum* culture grown in LB, untreated and treated with different concentrations of *M. bracteata* EO. Control (untreated with EO), 5‰, 2.5‰, 1.25‰, and 0.625‰.

A

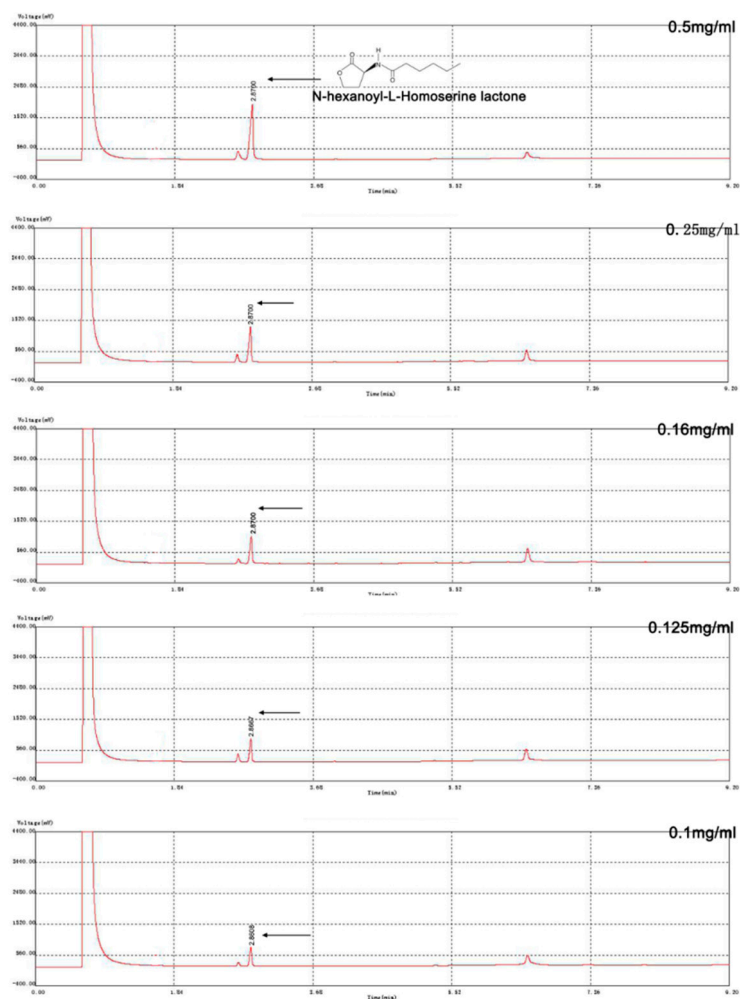

B

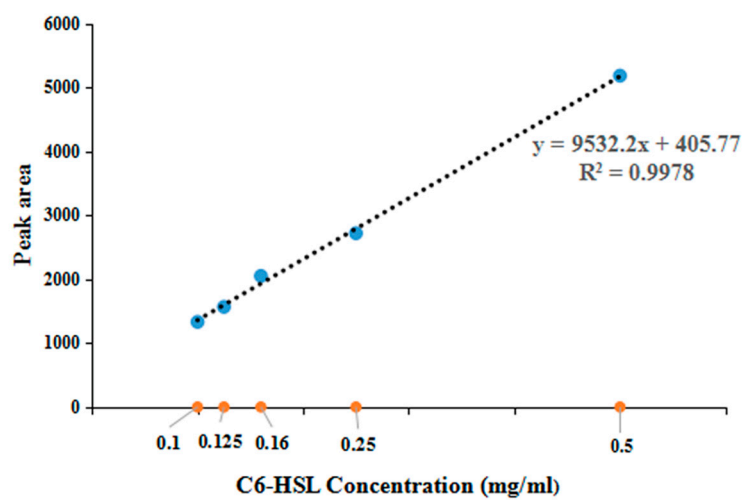

Figure S2. GC determination of the standard curve of C6-HSL (A). The standard curve of C6-HSL (B).

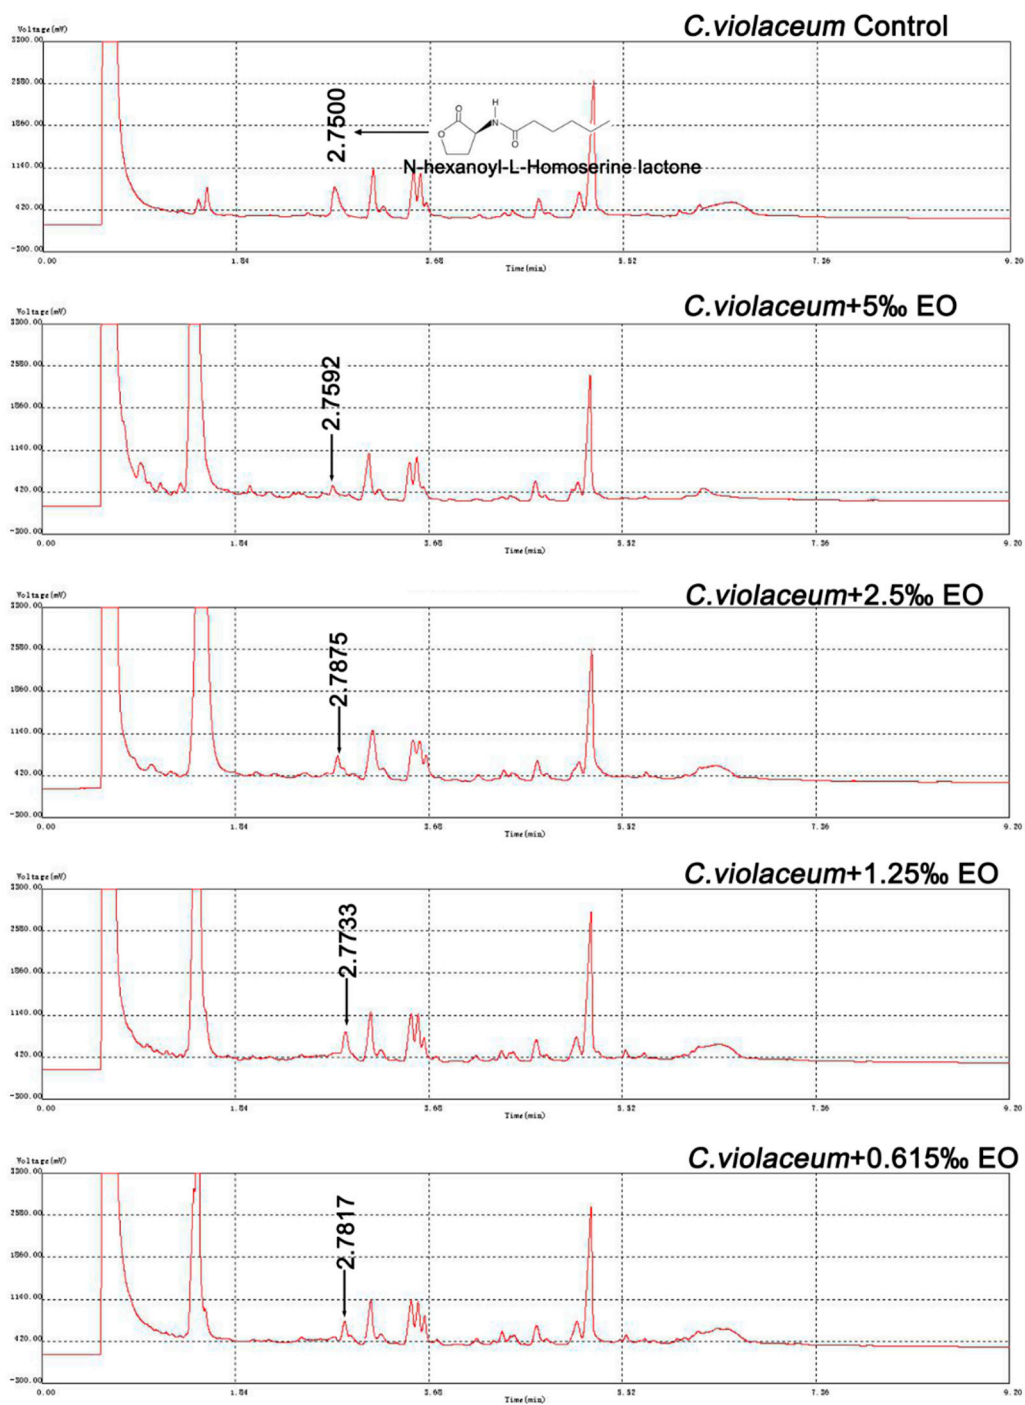

**Figure S3.** GC analysis of the effect of *M. bracteata* EO at different concentration (5‰, 2.5‰, 1.25‰, and 0.625‰) on C6-HSL production of *C. violaceum*.

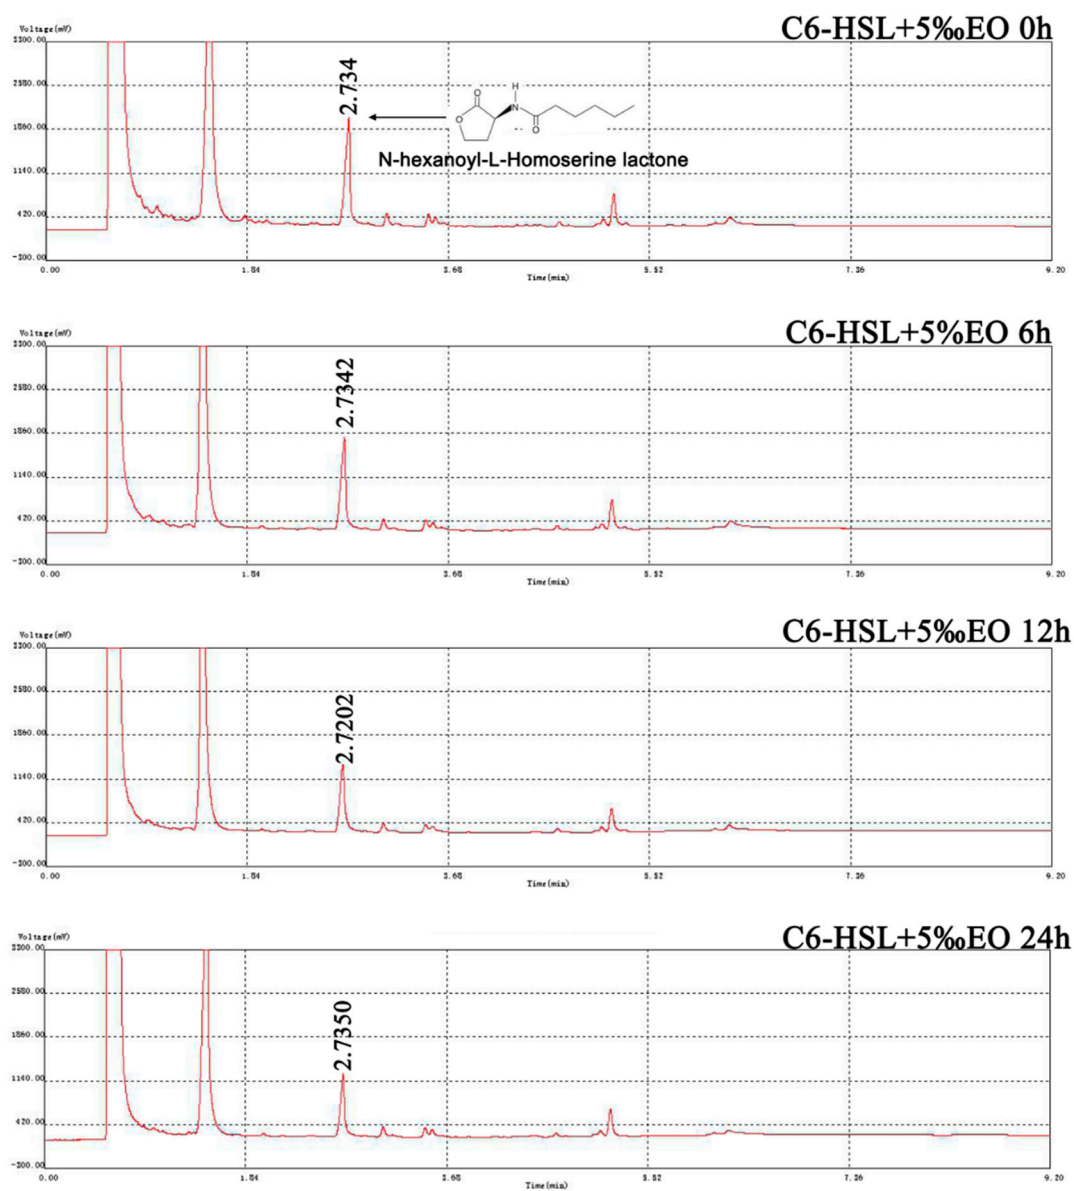

**Figure S4.** GC analysis of the effect of *M. bracteata* EO (5%) on C6-HSL treated for 0, 6, 12, and 24 h.

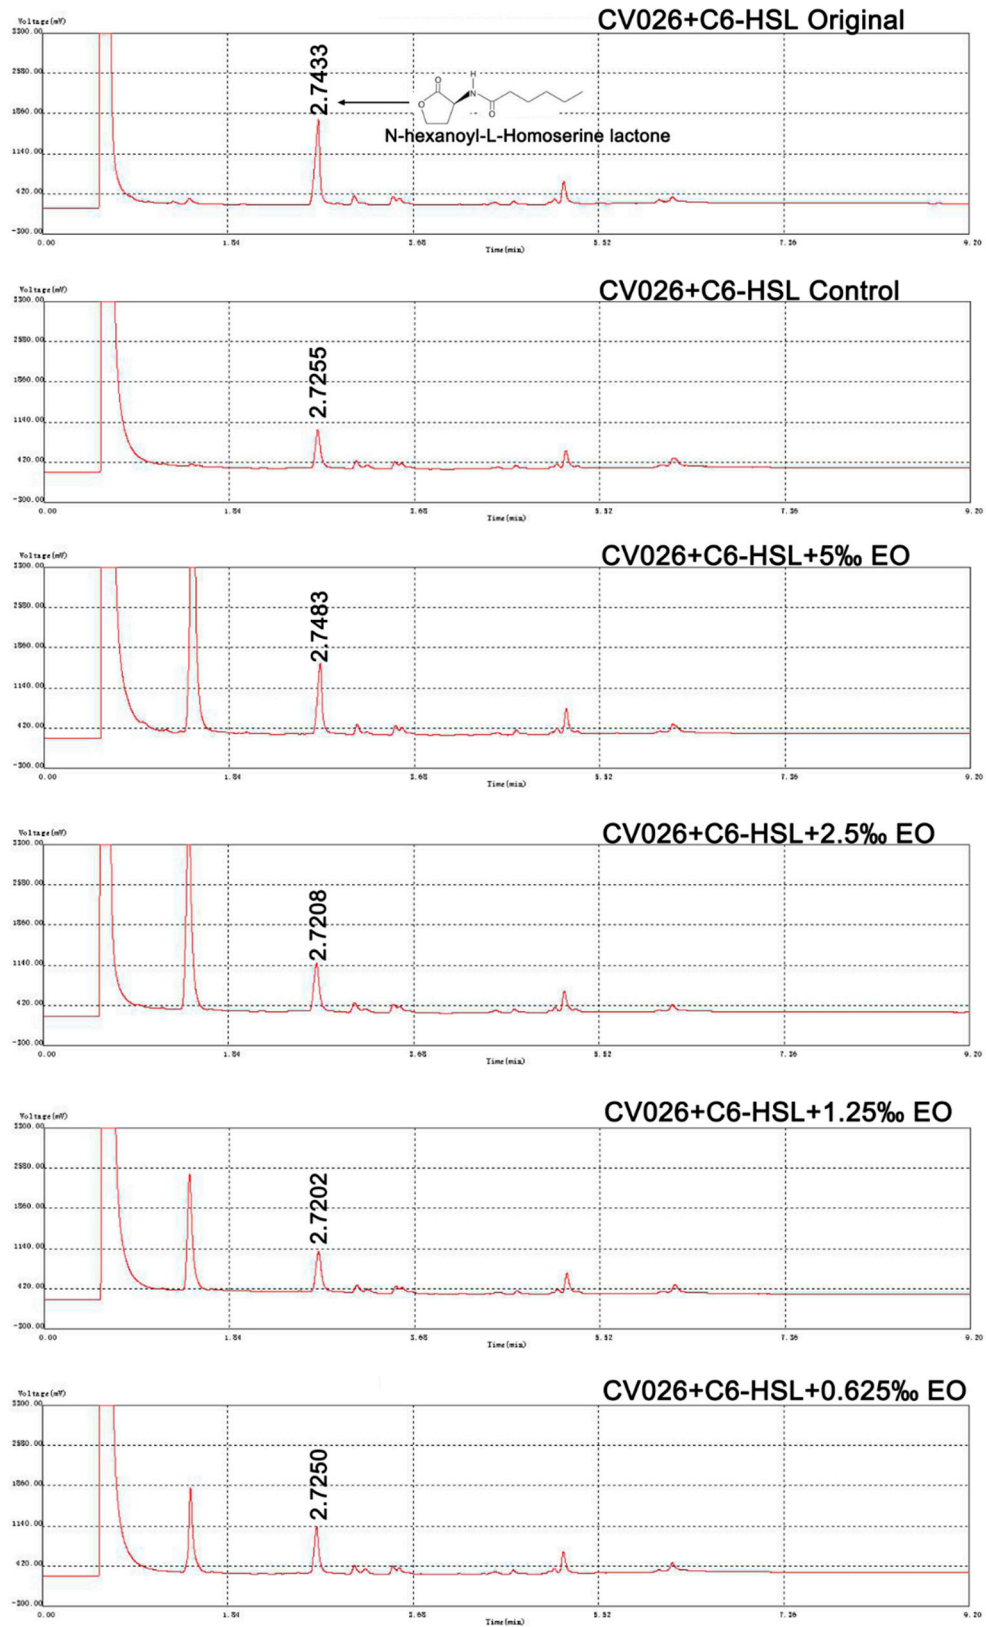

**Figure S5.** GC analysis of the effect of *M. bracteata* EO at different concentrations (5%, 2.5%, 1.25% and 0.625%) on C6-HSL of *C. violaceum* CV026.

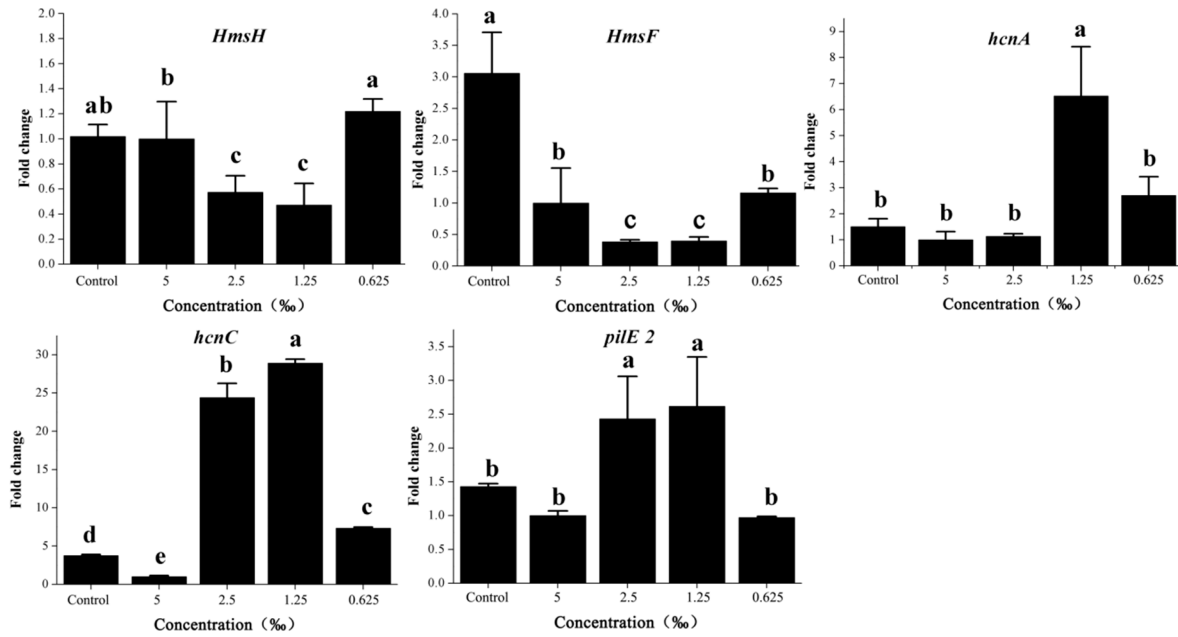

**Figure S6.** Effect of *M. bracteata* EO on the expression of virulence genes related to QS . *hmsH*, *hmsF*, *hcnA*, *hcnC* and *pilE2* were detected in response to *M. bracteata* EO treatment. Expression of the house-keeping gene *rpoD* was used as the internal control for each sample. The *M. bracteata* EO treatment concentrations were: 5‰, 2.5‰, 1.25‰, and 0.625‰. Control was untreated.



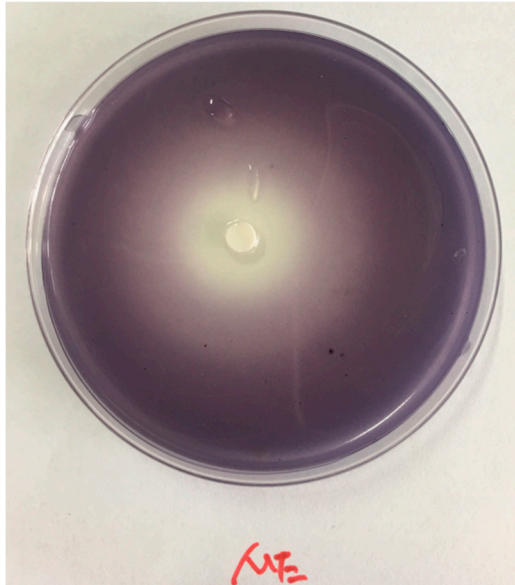

**Figure S7.** QSI effect of methyleugenol (ME) on biosensor CV026.
